# Supplementary material
Source: PubMed Central journal article supplement (PMC3416000)
Supplement: supp_112.140574_FigureS1.pdf [file supp_112.140574_FigureS1.pdf]

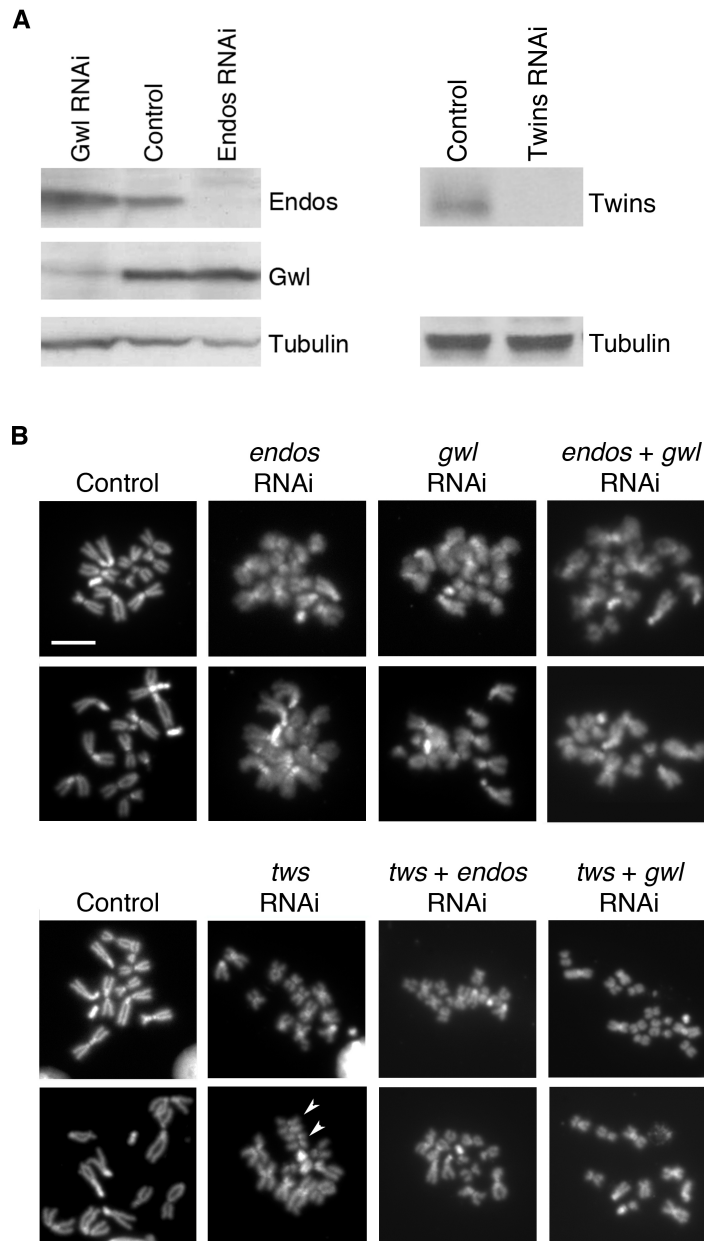

**Figure S1** Condensation state of chromosomes from tissue culture cells subjected to *gwl-endos-PP2A/B55* pathway RNAi. **(A)** Depletion of Gwl, Endos, and Twins from S2 tissue culture cells by RNAi. S2 cells were treated with either control dsRNA or with dsRNAs for the indicated genes, and protein extracts were analyzed for the indicated component by Western blot. **(B)** Chromosome condensation phenotypes in S2 tissue culture cells depleted for components of the Gwl-Endos-PP2A/B55 module. S2 cells were treated with either control dsRNA or with dsRNAs for the indicated genes, and chromosome squashes were prepared as described in Materials and Methods. Chromosome undercondensation is obvious in *endos*, *gwl*, and *endos + gwl* RNAi cells. In contrast, RNAi for *twins* (the B55 regulatory subunit of PP2A) causes chromosome overcondensation: the chromosomes are shorter along their long axis. The *twins* RNAi phenotype is epistatic to that of *endos* or *gwl* RNAi.
