# Supplementary material
Source: PubMed Central journal article supplement (PMC3416000)
Supplement: supp_112.140574_FigureS2.pdf [file supp_112.140574_FigureS2.pdf]

**A**

|             |                                                                                                                                                                                                                                                                                                                                                                |     |
|-------------|----------------------------------------------------------------------------------------------------------------------------------------------------------------------------------------------------------------------------------------------------------------------------------------------------------------------------------------------------------------|-----|
| D.m. Endos  | <b>MS</b> <b>SAEENSNS</b> <b>PATT</b> PQDTET <b>TE</b> QANL <b>T</b> D <b>LEKIEE</b> EKLKSKYPSGMRV <b>PGG</b> -H <b>S</b> A <b>F</b> L <b>Q</b> K <b>R</b> L <b>Q</b>                                                                                                                                                                                          | 60  |
| C.e. Endos  | -----MRGE <b>AGELAVSSGEIATGAL</b> <b>S</b> PEK <b>Q</b> Q <b>EQELMGKLAATGKLP</b> AR <b>P</b> ASS <b>F</b> L <b>Q</b> K <b>K</b> L <b>Q</b>                                                                                                                                                                                                                     | 54  |
| X.l. Endos  | <b>MS</b> DKYLGDSH <b>LEET</b> G <b>EE</b> KQDS <b>Q</b> E <b>KEAV</b> <b>T</b> PE <b>K</b> A <b>EE</b> Q <b>LK</b> SKYP <b>N</b> LGG <b>K</b> PGG--SD <b>F</b> L <b>M</b> K <b>R</b> L <b>Q</b>                                                                                                                                                               | 59  |
| H.s. Endos  | <b>MS</b> Q <b>K</b> Q <b>EEEN</b> PA <b>EE</b> T <b>G</b> E <b>E</b> KQDT <b>Q</b> E <b>KE</b> G <b>L</b> PE <b>K</b> A <b>EE</b> A <b>K</b> L <b>K</b> A <b>K</b> Y <b>P</b> S <b>L</b> G <b>Q</b> K <b>P</b> GG--SD <b>F</b> L <b>M</b> K <b>R</b> L <b>Q</b>                                                                                               | 59  |
| X.l. Arpp19 | <b>MS</b> RD <b>N</b> Q <b>E</b> IK <b>AP</b> E <b>ES</b> SA <b>EE</b> Q <b>K</b> EM <b>DD</b> K <b>V</b> T <b>S</b> PE <b>K</b> A <b>EE</b> I <b>K</b> L <b>K</b> S <b>R</b> Y <b>P</b> N <b>I</b> G <b>P</b> K <b>P</b> GG--SD <b>F</b> L <b>R</b> K <b>R</b> L <b>Q</b>                                                                                     | 59  |
| H.s. Arpp19 | <b>MS</b> - <b>AEV</b> -----PE <b>AA</b> S <b>AE</b> E <b>Q</b> K <b>EM</b> ED <b>K</b> V <b>T</b> <b>S</b> PE <b>K</b> A <b>EE</b> A <b>K</b> L <b>K</b> A <b>R</b> Y <b>P</b> H <b>L</b> G <b>Q</b> K <b>P</b> GG--SD <b>F</b> L <b>R</b> K <b>R</b> L <b>Q</b>                                                                                              | 54  |
| C.e. G1b30  | <b>MS</b> FA <b>E</b> IDS <b>A</b> IL <b>W</b> RE <b>V</b> L <b>R</b> ----- <b>E</b> D <b>K</b> V <b>T</b> <b>S</b> PE <b>K</b> A <b>EE</b> A <b>K</b> L <b>K</b> A <b>R</b> Y <b>P</b> H <b>L</b> G <b>Q</b> K <b>P</b> GG--SD <b>F</b> L <b>R</b> K <b>R</b> L <b>Q</b><br>----- <b>F</b> I <b>I</b> D <b>R</b> M <b>K</b>                                   | 25  |
|             |                                                                                                                                                                                                                                                                                                                                                                |     |
| D.m. Endos  | <b>K</b> G <b>Q</b> K <b>F</b> F <b>D</b> <b>S</b> <b>G</b> D <b>Y</b> Q <b>M</b> A <b>K</b> Q <b>K</b> G <b>G</b> G-----                                                                                                                                                                                                                                      | 80  |
| C.e. Endos  | <b>Q</b> - <b>R</b> <b>K</b> <b>F</b> F <b>D</b> <b>S</b> <b>G</b> D <b>Y</b> A <b>M</b> D <b>K</b> S <b>K</b> A <b>G</b> T <b>G</b> L <b>G</b> S <b>K</b> P <b>H</b> P <b>L</b> A <b>G</b> G <b>P</b> P <b>P</b> A <b>A</b> P <b>P</b> V <b>V</b> A <b>Q</b> R <b>S</b> P <b>A</b> P <b>A</b> A <b>T</b> T <b>P</b> <b>S</b> P <b>S</b> A <b>S</b> P <b>I</b> | 113 |
| X.l. Endos  | <b>K</b> G <b>G</b> K <b>Y</b> F <b>D</b> <b>S</b> <b>G</b> D <b>Y</b> N <b>M</b> A <b>K</b> A <b>K</b> M <b>K</b> N-----                                                                                                                                                                                                                                      | 79  |
| H.s. Endos  | <b>K</b> G <b>Q</b> K <b>Y</b> F <b>D</b> <b>S</b> <b>G</b> D <b>Y</b> N <b>M</b> A <b>K</b> A <b>K</b> M <b>K</b> N-----                                                                                                                                                                                                                                      | 79  |
| X.l. Arpp19 | <b>K</b> G <b>Q</b> K <b>Y</b> F <b>D</b> <b>S</b> <b>G</b> D <b>Y</b> N <b>M</b> A <b>K</b> A <b>K</b> M <b>K</b> N-----                                                                                                                                                                                                                                      | 79  |
| H.s. Arpp19 | <b>K</b> G <b>Q</b> K <b>Y</b> F <b>D</b> <b>S</b> <b>G</b> D <b>Y</b> N <b>M</b> A <b>K</b> A <b>K</b> M <b>K</b> N-----                                                                                                                                                                                                                                      | 74  |
| C.e. G1b30  | <b>V</b> G-- <b>Y</b> S <b>E</b> <b>S</b> <b>G</b> A <b>I</b> R <b>K</b> S <b>N</b> K <b>Q</b> A <b>I</b> N-----                                                                                                                                                                                                                                               | 43  |
|             |                                                                                                                                                                                                                                                                                                                                                                |     |
| D.m. Endos  | --V <b>K</b> Q <b>V</b> F <b>A</b> --- <b>N</b> K <b>V</b> T <b>T</b> G <b>E</b> A <b>I</b> P <b>T</b> P <b>E</b> T <b>V</b> P <b>A</b> R <b>K</b> T <b>S</b> I <b>I</b> O <b>P</b> C <b>N</b> K <b>F</b> P <b>A</b> T <b>S</b>                                                                                                                                | 119 |
| C.e. Endos  | S <b>Q</b> T <b>N</b> R <b>P</b> S--S <b>D</b> R <b>N</b> S <b>D</b> D <b>D</b> N <b>L</b> Q <b>I</b> P <b>R</b> D <b>T</b> V <b>P</b> Q <b>R</b> K <b>A</b> S <b>I</b> I <b>N</b> P <b>S</b> V <b>H</b> C <b>K</b> L <b>S</b> P <b>A</b> P <b>H</b> V <b>Q</b> H <b>H</b> D <b>A</b> A <b>P</b> N <b>A</b> T <b>S</b> E                                       | 174 |
| X.l. Endos  | --- <b>K</b> Q <b>L</b> P <b>C</b> A <b>G</b> P <b>D</b> <b>K</b> N <b>L</b> V <b>T</b> G <b>D</b> H <b>I</b> P <b>T</b> P <b>Q</b> D <b>L</b> P <b>Q</b> R <b>K</b> S <b>S</b> L <b>V</b> T <b>S</b> <b>K</b> L <b>A</b> G <b>H</b> V <b>E</b> D <b>L</b> H <b>H</b> V                                                                                        | 125 |
| H.s. Endos  | --- <b>K</b> Q <b>L</b> P <b>S</b> A <b>G</b> A <b>D</b> <b>K</b> N <b>L</b> V <b>T</b> G <b>D</b> H <b>I</b> P <b>T</b> P <b>Q</b> D <b>L</b> P <b>Q</b> R <b>K</b> S <b>S</b> L <b>V</b> T <b>S</b> <b>K</b> L <b>A</b> G <b>G</b> Q <b>V</b> E                                                                                                              | 121 |
| X.l. Arpp19 | --- <b>K</b> Q <b>L</b> P <b>T</b> A <b>A</b> P <b>D</b> <b>K</b> T <b>E</b> V <b>T</b> G <b>D</b> H <b>I</b> P <b>T</b> P <b>Q</b> D <b>L</b> P <b>Q</b> R <b>K</b> P <b>S</b> L <b>V</b> A <b>S</b> K <b>L</b> A <b>G</b>                                                                                                                                    | 117 |
| H.s. Arpp19 | --- <b>K</b> Q <b>L</b> P <b>T</b> A <b>A</b> P <b>D</b> <b>K</b> T <b>E</b> V <b>T</b> G <b>D</b> H <b>I</b> P <b>T</b> P <b>Q</b> D <b>L</b> P <b>Q</b> R <b>K</b> P <b>S</b> L <b>V</b> A <b>S</b> K <b>L</b> A <b>G</b>                                                                                                                                    | 112 |
| C.e. G1b30  | --- <b>G</b> Q <b>H</b> S <b>I</b> S <b>G</b> D <b>D</b> <b>S</b> G <b>L</b> S <b>S</b> G <b>L</b> S <b>V</b> E <b>T</b> <b>K</b> Q <b>D</b> L <b>T</b> Q <b>V</b> K <b>I</b> S <b>A</b> F <b>S</b> G <b>R</b>                                                                                                                                                 | 78  |
|             |                                                                                                                                                                                                                                                                                                                                                                |     |
| C.e. Endos  | <b>MR</b> GE <b>AGELAVSSGEIATG</b> -- <b>AL</b> <b>S</b> PE <b>K</b> Q <b>Q</b> E <b>Q</b> E <b>L</b> M <b>G</b> K <b>L</b> A <b>A</b> T <b>G</b> K <b>L</b> P <b>A</b> R <b>P</b> A <b>S</b> S <b>F</b> L <b>O</b> K <b>K</b> L <b>-Q</b> <b>Q</b>                                                                                                            | 55  |
| C.b1. Endos | <b>MR</b> GE <b>AGELAVSSGEIATG</b> -- <b>AL</b> <b>S</b> PE <b>K</b> Q <b>Q</b> E <b>Q</b> E <b>L</b> M <b>G</b> K <b>L</b> A <b>A</b> T <b>G</b> K <b>L</b> P <b>A</b> R <b>P</b> A <b>S</b> S <b>F</b> L <b>O</b> K <b>K</b> L <b>-Q</b> <b>Q</b>                                                                                                            | 55  |
| C.b2. Endos | <b>MR</b> GE <b>AGELAVSSGEIATG</b> -- <b>AL</b> <b>S</b> PE <b>K</b> Q <b>Q</b> E <b>Q</b> E <b>L</b> M <b>G</b> K <b>L</b> A <b>A</b> T <b>G</b> K <b>L</b> P <b>A</b> R <b>P</b> A <b>S</b> S <b>F</b> L <b>O</b> K <b>K</b> L <b>-Q</b> <b>Q</b>                                                                                                            | 55  |
| B.m. Endos  | <b>M</b> --- <b>L</b> G <b>G</b> V <b>Q</b> N <b>L</b> D <b>E</b> A <b>K</b> K <b>L</b> N <b>E</b> E <b>N</b> F <b>N</b> F <b>E</b> K <b>Q</b> E <b>D</b> L <b>L</b> M <b>S</b> K <b>L</b> A <b>A</b> N <b>G</b> K <b>L</b> P <b>V</b> K <b>P</b> Q <b>S</b> T <b>F</b> L <b>O</b> K <b>K</b> L <b>Q</b> <b>Q</b>                                              | 55  |
| L.l. Endos  | <b>M</b> E <b>A</b> M <b>L</b> G <b>G</b> V <b>Q</b> N <b>L</b> E <b>G</b> A <b>E</b> K <b>L</b> A <b>D</b> E <b>D</b> F <b>T</b> F <b>E</b> K <b>Q</b> E <b>H</b> L <b>L</b> M <b>S</b> K <b>L</b> A <b>S</b> N <b>G</b> K <b>L</b> P <b>V</b> K <b>P</b> Q <b>S</b> T <b>F</b> L <b>O</b> K <b>K</b> L <b>Q</b> <b>Q</b>                                     | 58  |
| T.s. Endos  | <b>M</b> Y <b>Q</b> Q----- <b>S</b> V <b>E</b> K <b>L</b> E <b>A</b> K <b>L</b> F <b>A</b> K <b>Y</b> P <b>Q</b> V <b>A</b> K-- <b>N</b> M <b>Q</b> M <b>S</b> Q <b>F</b> L <b>O</b> K <b>R</b> L <b>-Q</b> <b>Q</b>                                                                                                                                           | 37  |
|             |                                                                                                                                                                                                                                                                                                                                                                |     |
| C.e. Endos  | <b>R</b> K <b>F</b> F <b>D</b> <b>S</b> <b>G</b> D <b>Y</b> A <b>M</b> D <b>K</b> S <b>K</b> A <b>G</b> T <b>G</b> L <b>G</b> S <b>K</b> P <b>H</b> P <b>L</b> A <b>G</b> G <b>P</b> P <b>P</b> A <b>A</b> P <b>P</b> V- <b>V</b> A- <b>Q</b> R <b>S</b> P <b>A</b> P <b>A</b> A <b>T</b> T <b>P</b> <b>S</b> P <b>S</b> A <b>S</b>                            | 111 |
| C.b1. Endos | <b>R</b> K <b>F</b> F <b>D</b> <b>S</b> <b>G</b> D <b>Y</b> A <b>M</b> D <b>K</b> S <b>K</b> A <b>G</b> T <b>G</b> L <b>G</b> S <b>K</b> P <b>H</b> P <b>L</b> A <b>G</b> G <b>P</b> P <b>P</b> A <b>P</b> P <b>P</b> - <b>A</b> A <b>I</b> Q <b>K</b> S <b>P</b> A <b>P</b> A- <b>T</b> S <b>P</b> S <b>P</b> S <b>A</b> S                                    | 111 |
| C.b2. Endos | <b>R</b> K <b>F</b> F <b>D</b> <b>S</b> <b>G</b> D <b>Y</b> A <b>M</b> D <b>K</b> S <b>K</b> A <b>G</b> T <b>G</b> L <b>G</b> S <b>K</b> P <b>H</b> P <b>L</b> A <b>G</b> G <b>G</b> P <b>P</b> A <b>A</b> P <b>P</b> P <b>A</b> A <b>V</b> Q <b>K</b> S <b>P</b> A <b>P</b> A- <b>T</b> S <b>P</b> S <b>P</b> S <b>A</b> S                                    | 112 |
| B.m. Endos  | <b>R</b> K <b>F</b> F <b>D</b> <b>S</b> <b>G</b> D <b>Y</b> A <b>M</b> N <b>K</b> Q <b>K</b> T <b>N</b> <b>P</b> ----- <b>S</b> A <b>N</b> L <b>P</b> V <b>A</b> N <b>L</b> Q <b>N</b> I <b>M</b> H-- <b>R</b> S <b>A</b> S <b>V</b> S <b>S</b> A <b>Q</b> E <b>E</b> V <b>D</b> V                                                                             | 104 |
| L.l. Endos  | <b>R</b> K <b>F</b> F <b>D</b> <b>S</b> <b>G</b> D <b>Y</b> A <b>M</b> N <b>K</b> Q <b>K</b> T <b>S</b> N----- <b>L</b> S <b>A</b> N <b>L</b> P <b>A</b> D <b>L</b> Q <b>N</b> I <b>M</b> H-- <b>R</b> P <b>A</b> S <b>V</b> S <b>S</b> V <b>P</b> Q <b>E</b> - <b>V</b> D <b>V</b>                                                                            | 105 |
| T.s. Endos  | <b>R</b> K <b>Y</b> F <b>D</b> <b>S</b> <b>G</b> D <b>Y</b> N <b>M</b> A <b>K</b> A <b>K</b> ----- <b>G</b> L <b>K</b> L <b>N</b> T <b>L</b> ----- <b>P</b> A <b>T</b> P <b>S</b> S <b>V</b> E <b>I</b> --- <b>R</b> T <b>P</b> R <b>L</b> S <b>I</b> I <b>V</b> -----                                                                                         | 77  |
|             |                                                                                                                                                                                                                                                                                                                                                                |     |
| C.e. Endos  | <b>P</b> I <b>S</b> Q <b>Q</b> T <b>N</b> R <b>P</b> S <b>S</b> D <b>R</b> N <b>S</b> D <b>D</b> D <b>N</b> L-Q <b>I</b> P <b>R</b> P <b>D</b> T <b>V</b> P <b>Q</b> R <b>K</b> A <b>S</b> I <b>I</b> N <b>P</b> S <b>V</b> H-C <b>K</b> L <b>S</b> P <b>A</b> P <b>H</b> V <b>Q</b> H--- <b>H</b>                                                             | 164 |
| C.b1. Endos | <b>P</b> I <b>S</b> Q <b>Q</b> T <b>N</b> R <b>P</b> S <b>S</b> E <b>R</b> N <b>S</b> D <b>D</b> D <b>N</b> L-Q <b>I</b> P <b>R</b> P <b>D</b> T <b>V</b> P <b>Q</b> R <b>K</b> A <b>S</b> I <b>I</b> N <b>P</b> S <b>V</b> H-C <b>K</b> L <b>S</b> P <b>A</b> P <b>H</b> V <b>Q</b> H--- <b>H</b>                                                             | 164 |
| C.b2. Endos | <b>P</b> I <b>S</b> Q <b>Q</b> T <b>N</b> R <b>P</b> S <b>A</b> E <b>R</b> N <b>S</b> D <b>D</b> D <b>N</b> L-Q <b>I</b> P <b>R</b> P <b>D</b> T <b>V</b> P <b>Q</b> R <b>K</b> A <b>S</b> I <b>I</b> N <b>P</b> S <b>V</b> H-C <b>K</b> L <b>S</b> P <b>A</b> P <b>H</b> V <b>Q</b> H--- <b>H</b>                                                             | 165 |
| B.m. Endos  | <b>PL</b> N-- <b>I</b> D <b>V</b> S <b>T</b> A <b>V</b> R--- <b>D</b> E <b>S</b> L <b>L</b> Q <b>I</b> P <b>R</b> P <b>D</b> T <b>V</b> P <b>Q</b> R <b>K</b> S <b>S</b> I <b>I</b> Y <b>P</b> S <b>V</b> H-S <b>K</b> L <b>S</b> P <b>Q</b> P <b>Y</b> I <b>H</b> H <b>S</b> T <b>H</b>                                                                       | 153 |
| L.l. Endos  | <b>PL</b> --- <b>K</b> I <b>D</b> I <b>P</b> R <b>I</b> R--- <b>D</b> E <b>S</b> L <b>L</b> I <b>P</b> R <b>P</b> D <b>T</b> V <b>P</b> Q <b>R</b> K <b>S</b> <b>S</b> I <b>I</b> Y <b>P</b> S <b>V</b> H-S <b>K</b> L <b>S</b> P <b>Q</b> P <b>Y</b> I <b>H</b> H <b>S</b> A <b>-</b> H                                                                       | 156 |
| T.s. Endos  | -- <b>D</b> E <b>R</b> D <b>G</b> S <b>T</b> <b>P</b> T <b>G</b> M <b>C</b> ----- <b>I</b> P <b>T</b> P <b>D</b> S <b>I</b> P <b>H</b> R <b>K</b> S <b>S</b> I <b>V</b> S <b>E</b> L <b>V</b> V <b>G</b> T <b>A</b> P <b>S</b> P <b>I</b> -- <b>V</b> Q <b>H</b> Q <b>Q</b> H                                                                                  | 124 |
|             |                                                                                                                                                                                                                                                                                                                                                                |     |
| C.e. Endos  | <b>D</b> A <b>A</b> S <b>P</b> N <b>A</b> T <b>S</b> E                                                                                                                                                                                                                                                                                                         | 174 |
| C.b1. Endos | <b>D</b> A <b>A</b> S <b>P</b> S <b>A</b> T <b>N</b> E                                                                                                                                                                                                                                                                                                         | 174 |
| C.b2. Endos | <b>D</b> A <b>A</b> S <b>P</b> T <b>A</b> N <b>T</b> E                                                                                                                                                                                                                                                                                                         | 175 |
| B.m. Endos  | <b>D</b> S-D <b>P</b> L <b>T</b> G <b>P</b>                                                                                                                                                                                                                                                                                                                    | 161 |
| L.l. Endos  | <b>N</b> -- <b>D</b> P <b>L</b> P <b>G</b> P                                                                                                                                                                                                                                                                                                                   | 163 |
| T.s. Endos  |                                                                                                                                                                                                                                                                                                                                                                |     |

**Figure S2** Endosulfine-family proteins. **(A)** Endosulfine in *Drosophila melanogaster* (D.m.) and *Caenorhabditis elegans* (C.e.) are compared with Endosulfine and its paralog Arpp19 in *Xenopus laevis* (X.l.) and humans (H.s.). G1b30 is a *C. elegans* globin family protein with limited homology to Endosulfine around the site targeted by Greatwall (*pink* shading). Amino acids that are identical between fly Endosulfine and other proteins are shaded in yellow, amino acids shared by other proteins but not fly Endosulfine are shaded in grey. Green shading indicates proline-directed S/T P sites potentially targeted by CDKs. The Ser illuminated by aqua shading is a site apparently phosphorylated by PKA and of unknown function. The underlined sequence in *C. elegans* Endosulfine is removed by the deletion allele *ensa-1(tm2810)*. **(B)** Comparisons of nematode Endosulfine sequences. Species: *Caenorhabditis elegans* (C.e.), *Caenorhabditis briggsae* (C.b1.), *Caenorhabditis brenneri* (C.b2.), *Brugia malayi* (B.m.), *Loa loa* (L.l.), and *Trichinella spiralis* (T.s.). Colored shading as in part (A).
