# Supplementary material
Source: PubMed Central journal article supplement (PMC3416000)
Supplement: supp_112.140574_FigureS3.pdf [file supp_112.140574_FigureS3.pdf]

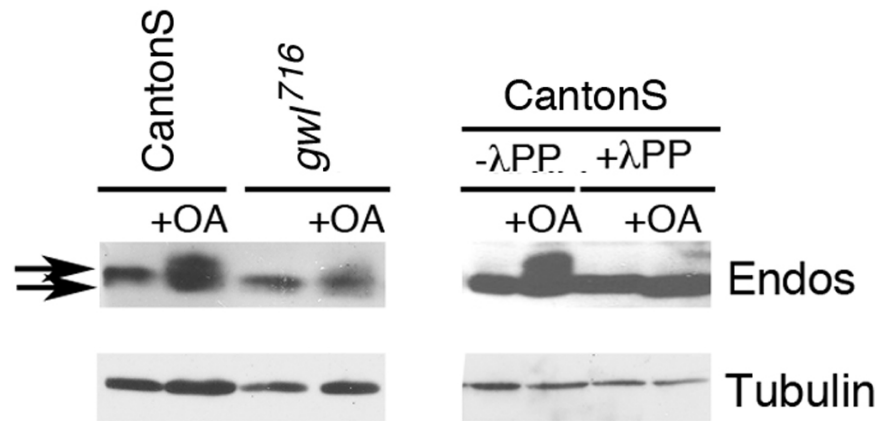

**Figure S3** Phosphorylation of Endos by Gwl *in vivo*. Western blot developed with anti-Endos or anti-tubulin (loading control) antibodies to extracts from brains of control (Canton S) or *gwl*<sup>716</sup> mutant third instar larvae as shown. In the lanes marked +OA, the brains were treated with okadaic acid for 2 hours to block the action of phosphatases. In the right panel, brain extracts were treated with lambda phosphatase to show that the slow-migrating forms of Endos are due to phosphorylation. The fraction of Endos in phosphorylated forms is significantly decreased in the *gwl*<sup>716</sup> brains, but a small amount of phosphorylated Endos remains, presumably because Endos can be targeted by other kinases including PKA (DULUBOVA *et al.* 2001; MOCHIDA *et al.* 2010).
