# Supplementary material
Source: PubMed Central journal article supplement (PMC3416000)
Supplement: supp_112.140574_FigureS4.pdf [file supp_112.140574_FigureS4.pdf]

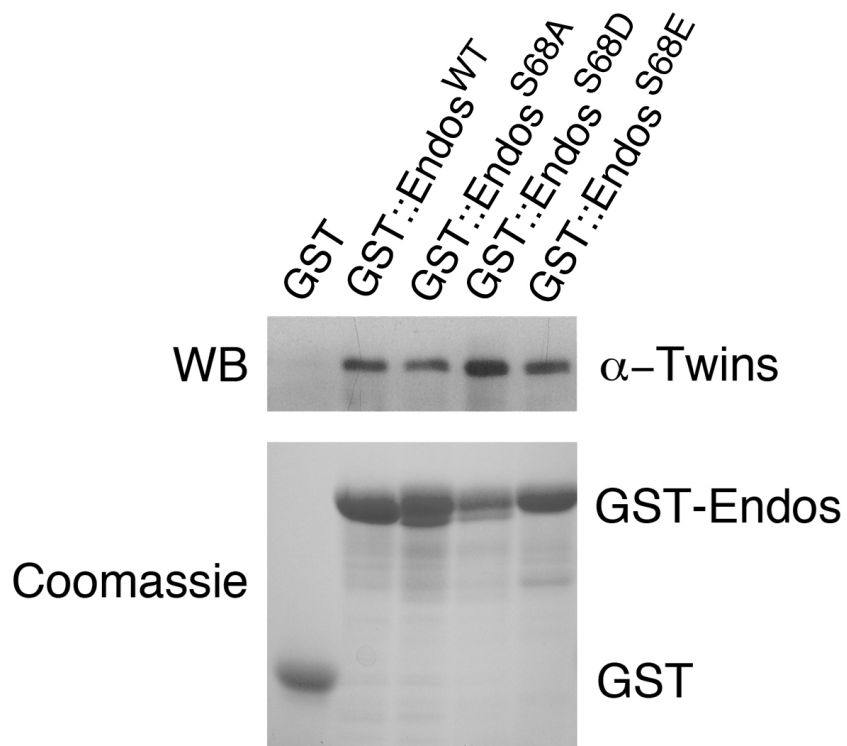

**Figure S4** Physical interaction between Endos and B55/Twins *in vitro*. Pull-down experiment using glutathione-Sepharose beads bound with the same GST fusion proteins as in Figure 6, but incubated with recombinant, purified Twins protein instead of *in vitro* transcribed/translated <sup>35</sup>S-labeled Twins. (Top) Twins protein binding to beads, as detected on Western blots (WB). Depending on the sample, between 10% and 20% of the input Twins was retained on the beads (not shown). (Bottom) Coomassie blue-stained gel showing that the beads used for *in vitro* binding reactions had similar amounts of bound GST::Endos fusion proteins.
