# Supplementary material
Source: PubMed Central journal article supplement (PMC3416000)
Supplement: supp_112.140574_FigureS5.pdf [file supp_112.140574_FigureS5.pdf]

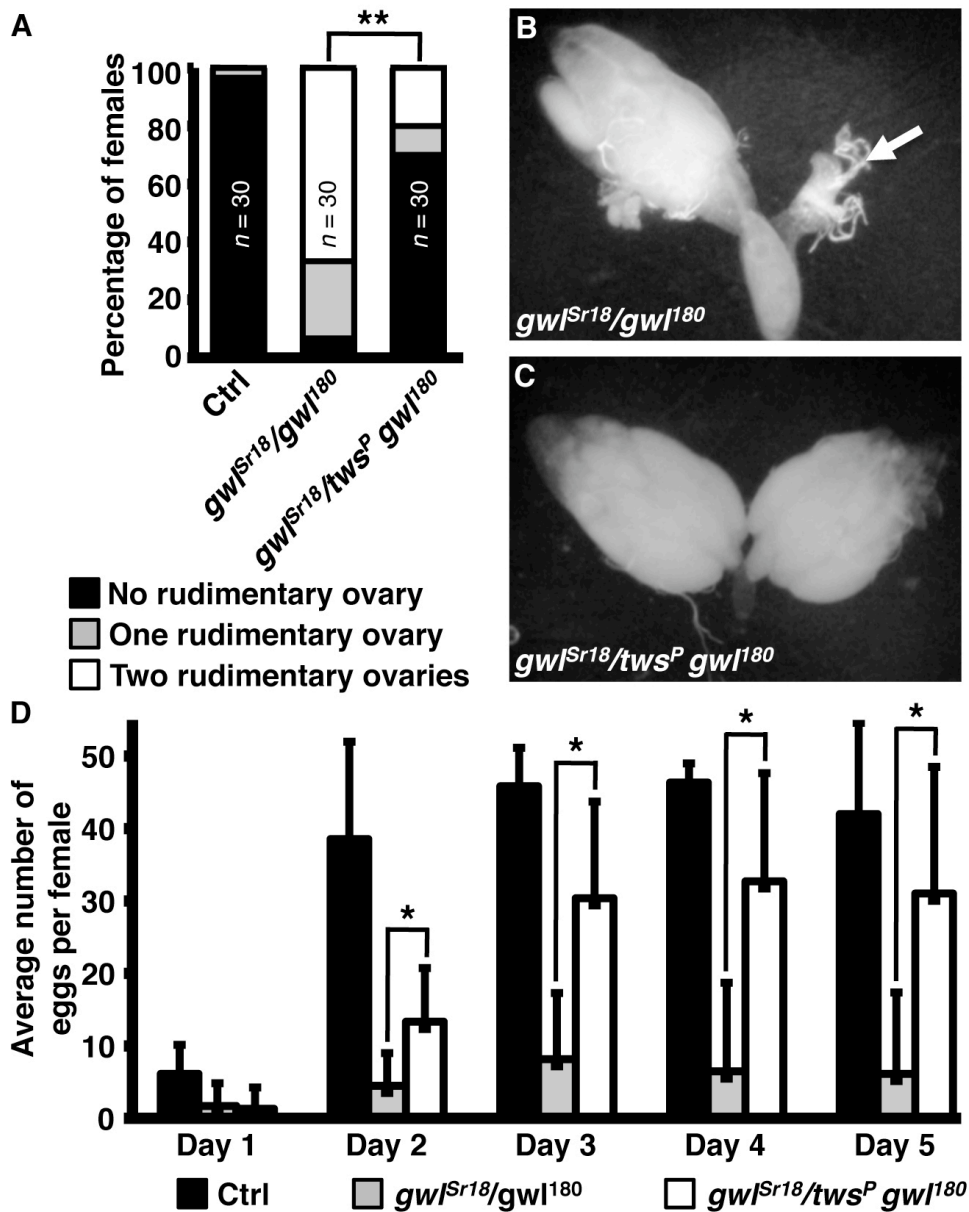

**Figure S5** Heterozygosity for *twins* rescues the rudimentary ovary phenotype of *gwl* mutants. **(A)** Percentage of wildtype control (Ctrl), *gwl<sup>Sr18</sup>/gwl<sup>180</sup>*, or *gwl<sup>Sr18</sup>/tws<sup>P</sup> gwl<sup>180</sup>* females carrying no, one, or two rudimentary ovaries. The number of analyzed females is shown inside the bars. Double asterisks indicate  $p < 0.001$ . **(B)** Example of *gwl<sup>Sr18</sup>/gwl<sup>180</sup>* pair of ovaries, with a rudimentary ovary indicated by the arrow. **(C)** Example of a pair of ovaries in a *gwl<sup>Sr18</sup>/tws<sup>P</sup> gwl<sup>180</sup>* female. **(D)** Average number of eggs laid per female per day. Error bars represent standard deviations. Asterisks indicate  $p < 0.05$ .
